# Supplementary material
Source: ML conference proceedings conference paper supplement (https://openreview.net/forum?id=bfsNmgN5je)

Results for WMT22 with the Ensemble  
of BERTScore, S-BERT and STSScore

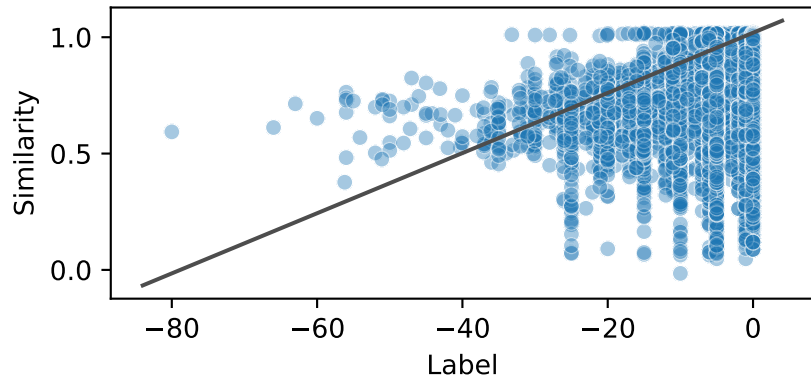

Results for WMT22 with BERTScore

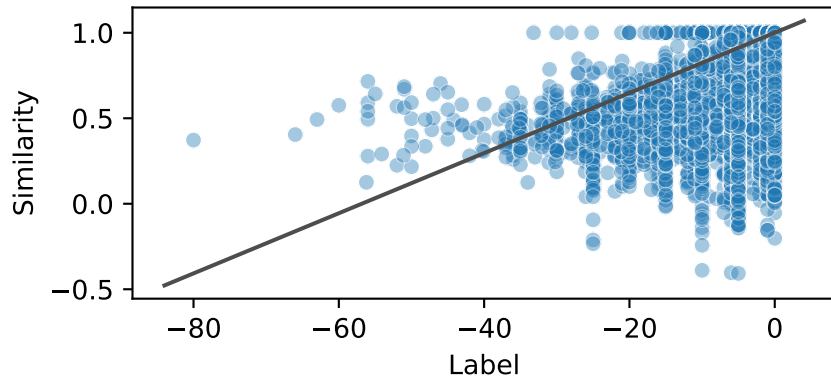

Results for WMT22 with S-BERT

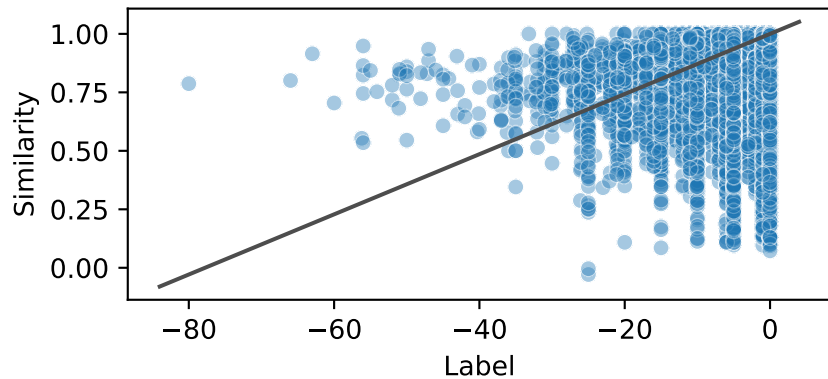

Results for WMT22 with STSScore

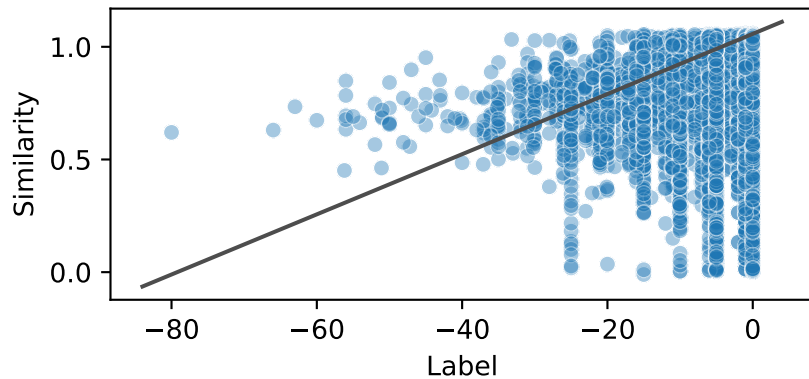

Supplement: supplementary_material [file attachment]
