# Supplementary material
Source: ML conference proceedings conference paper supplement (https://openreview.net/forum?id=bfsNmgN5je)

Results for QQP with BLEU

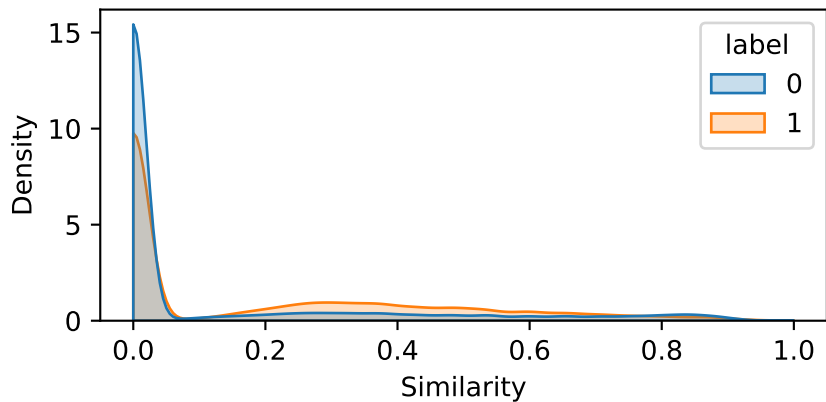

Results for QQP with BERTScore

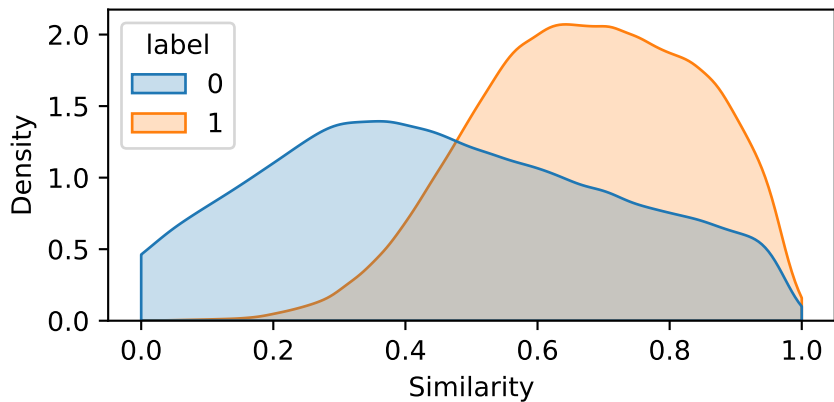

Results for QQP with S-BERT

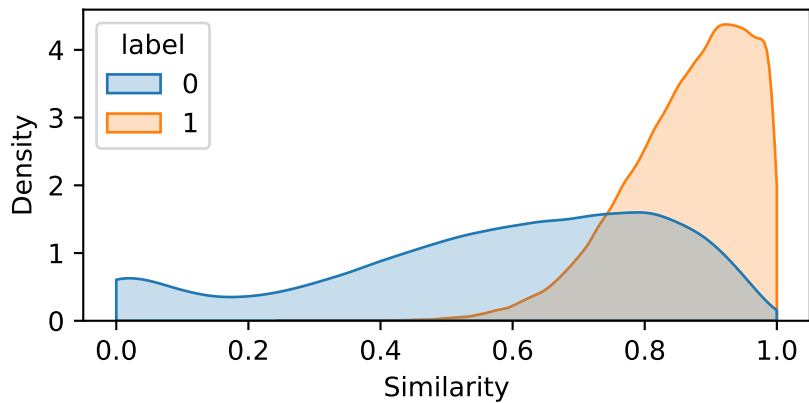

Results for QQP with STSScore

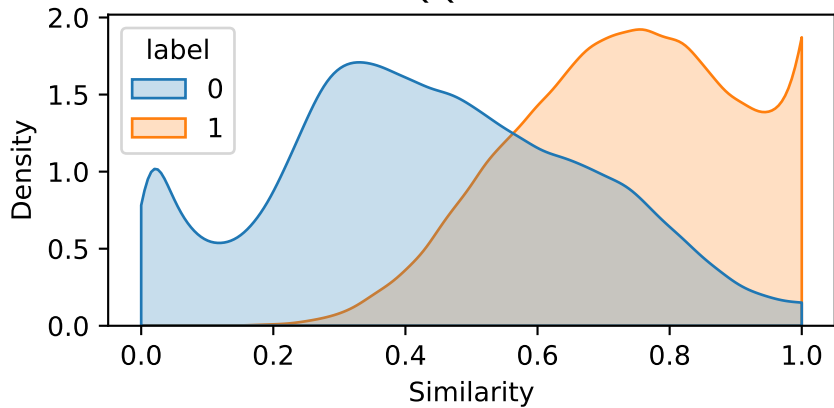

Supplement: supplementary_material [file attachment]
