# Supplementary material
Source: ML conference proceedings conference paper supplement (https://openreview.net/forum?id=bfsNmgN5je)

Results for STS-B with an ensemble of BERTScore, S-BERT and STSScore

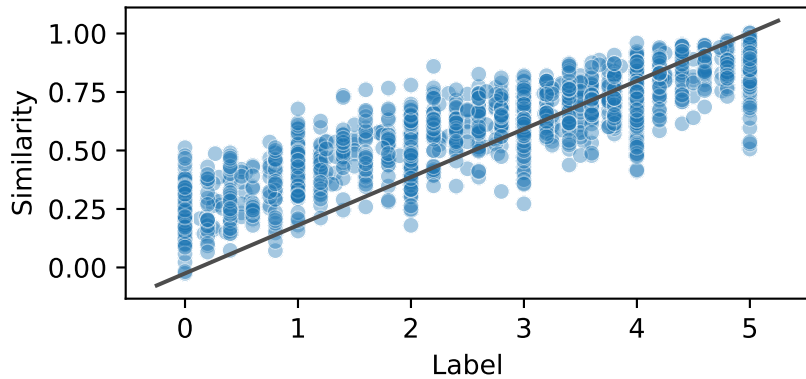

Results for STS-B with BERTScore

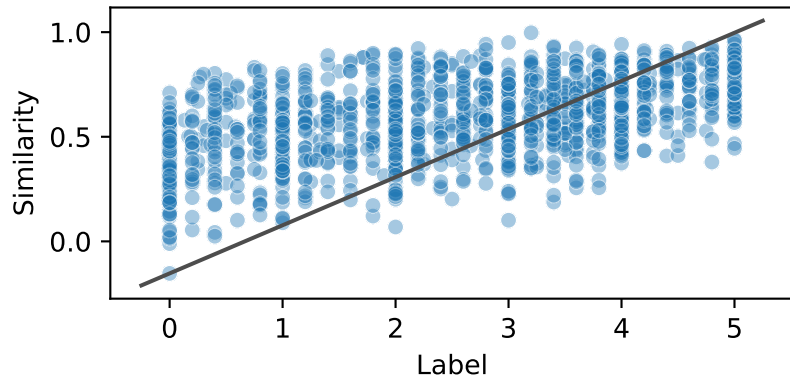

Results for STS-B with S-BERT

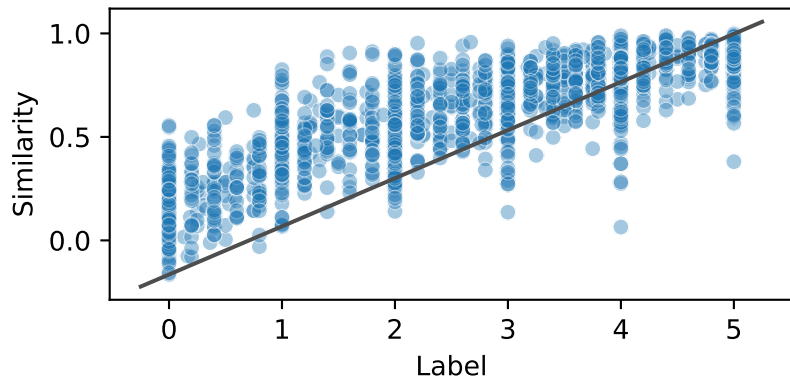

Results for STS-B with STSScore

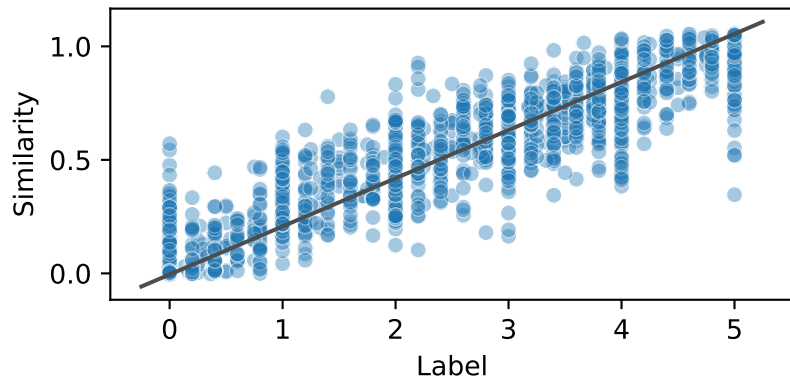

Supplement: supplementary_material [file attachment]
