# Supplementary material
Source: ML conference proceedings conference paper supplement (https://openreview.net/forum?id=bfsNmgN5je)

Results for STS-B with STSScore

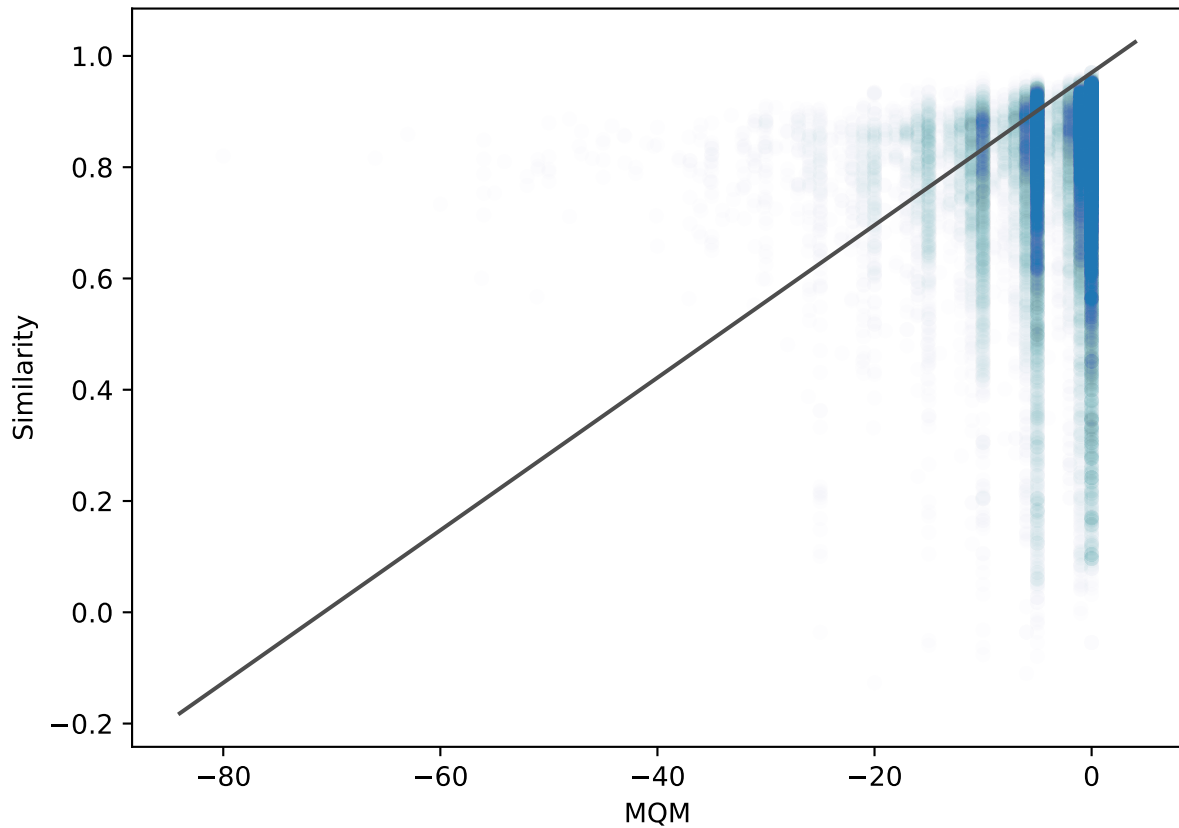

Supplement: supplementary_material [file attachment]

ROC for MRPC

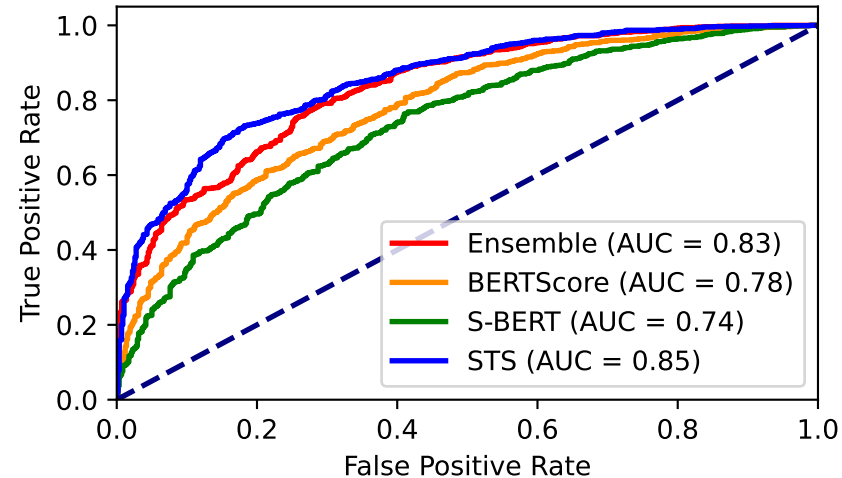

ROC for QQP

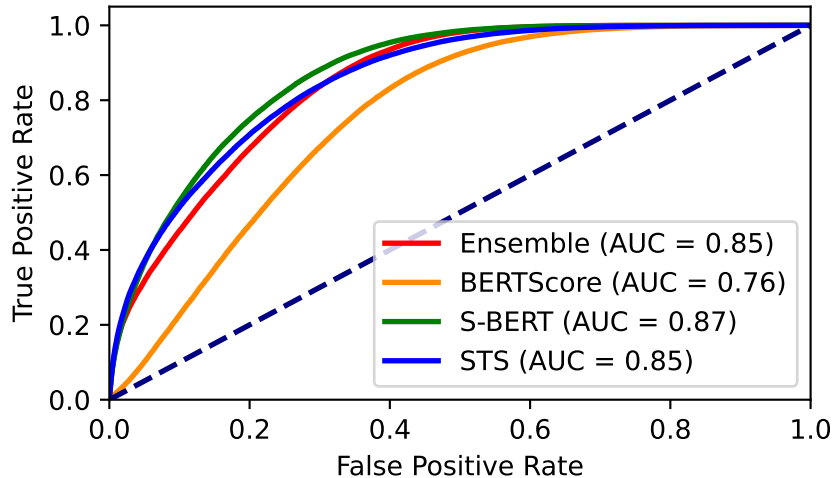

Supplement: supplementary_material [file attachment]

ROC for MRPC

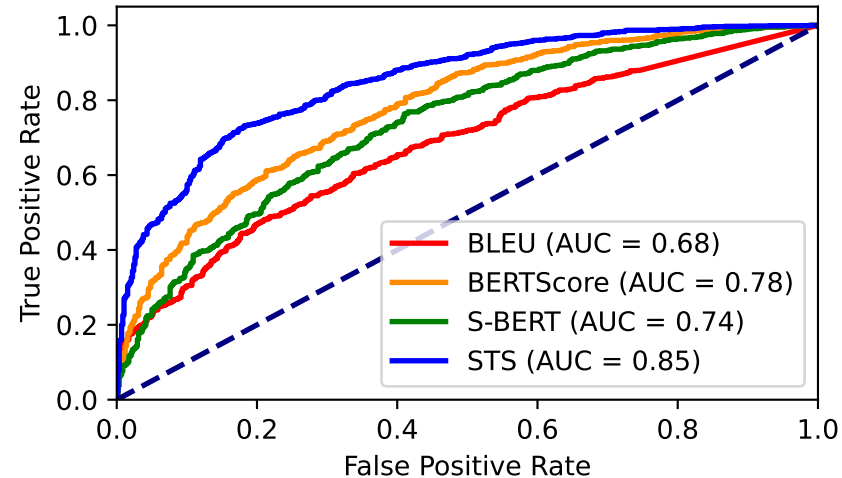

ROC for QQP

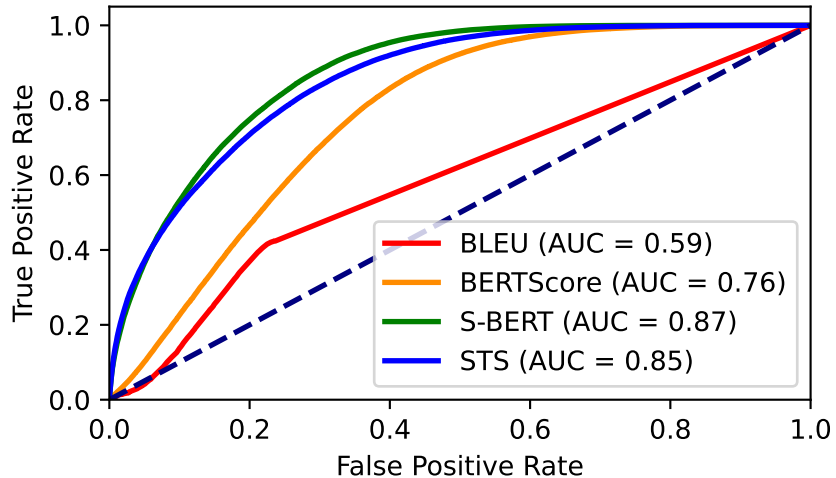

Supplement: supplementary_material [file attachment]

ROC for MRPC

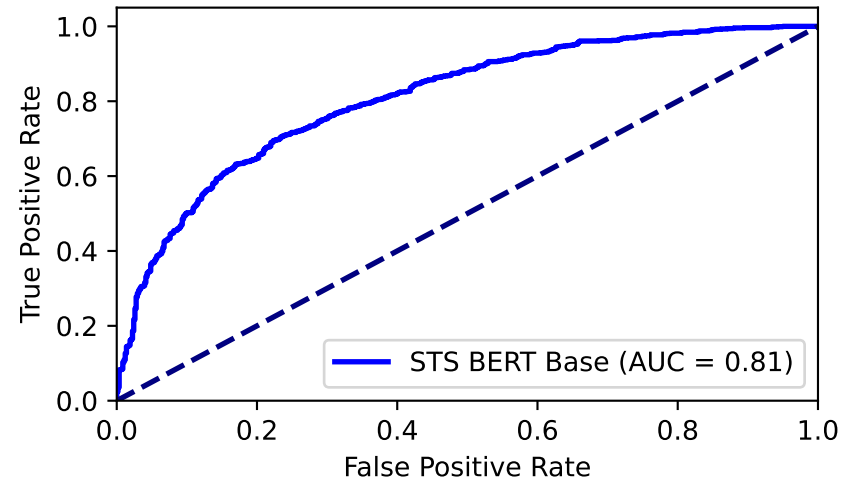

ROC for QQP

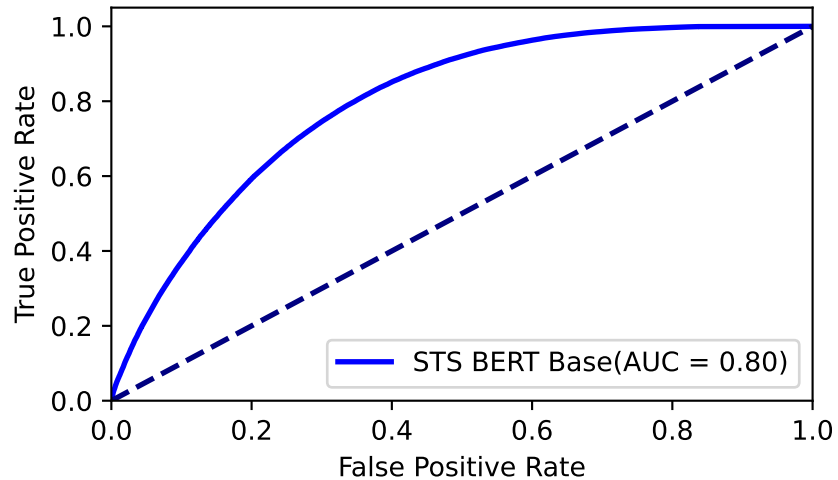

Supplement: supplementary_material [file attachment]

Results for QQP with STSScore with BERT base

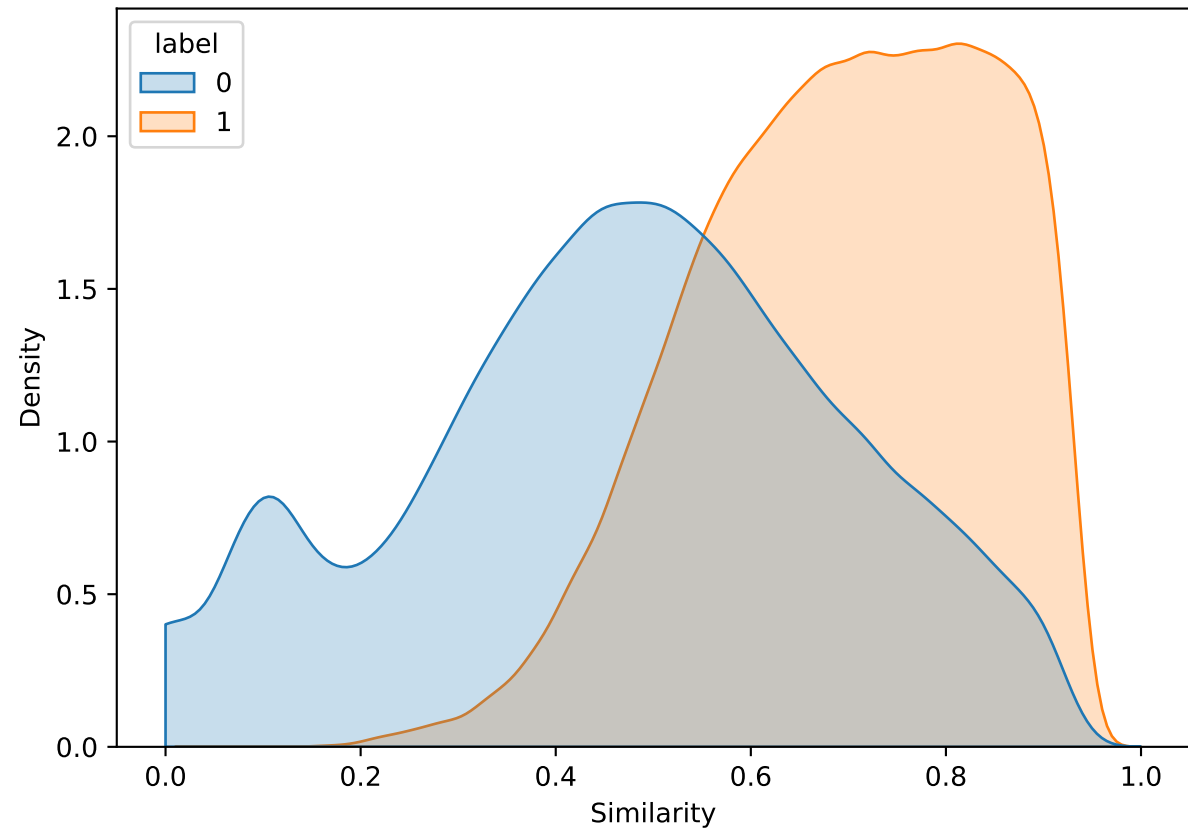

Supplement: supplementary_material [file attachment]

Results for STS-B with STSScore with BERT base

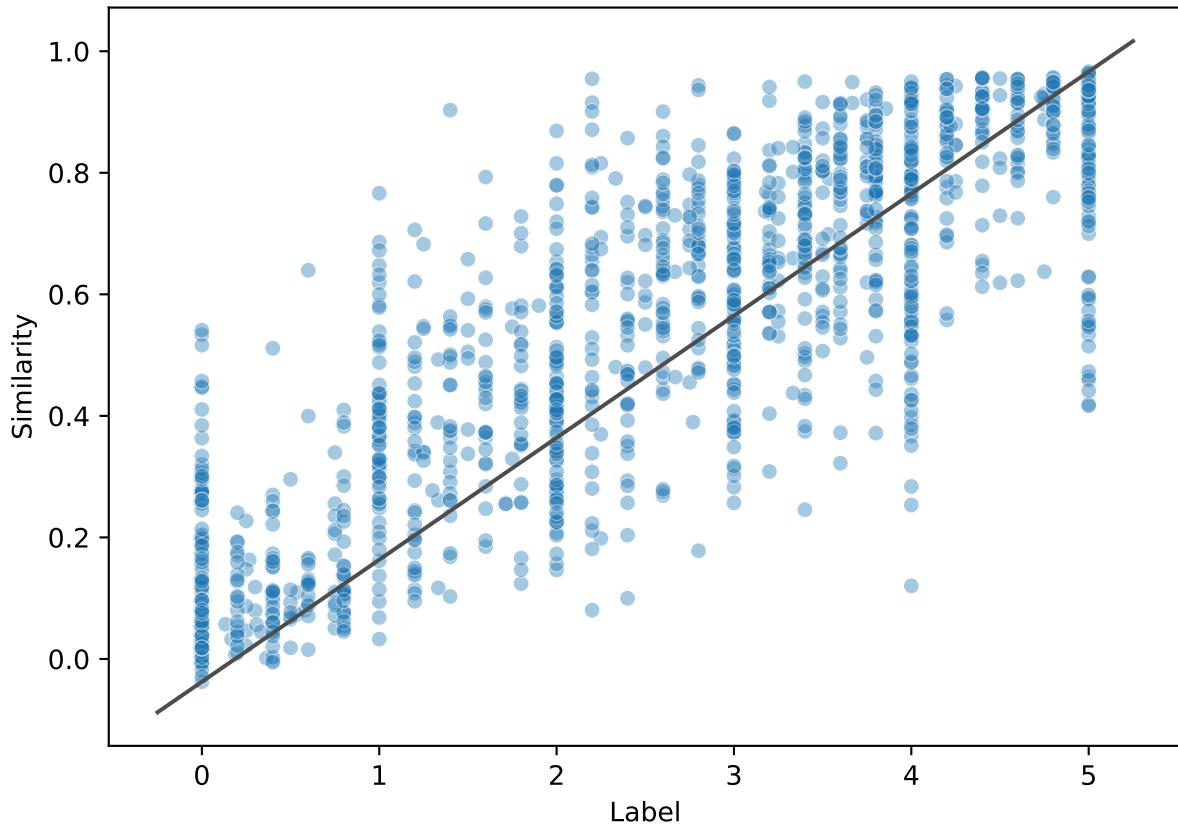

Supplement: supplementary_material [file attachment]

Results for MRPC with STSScore with BERT base

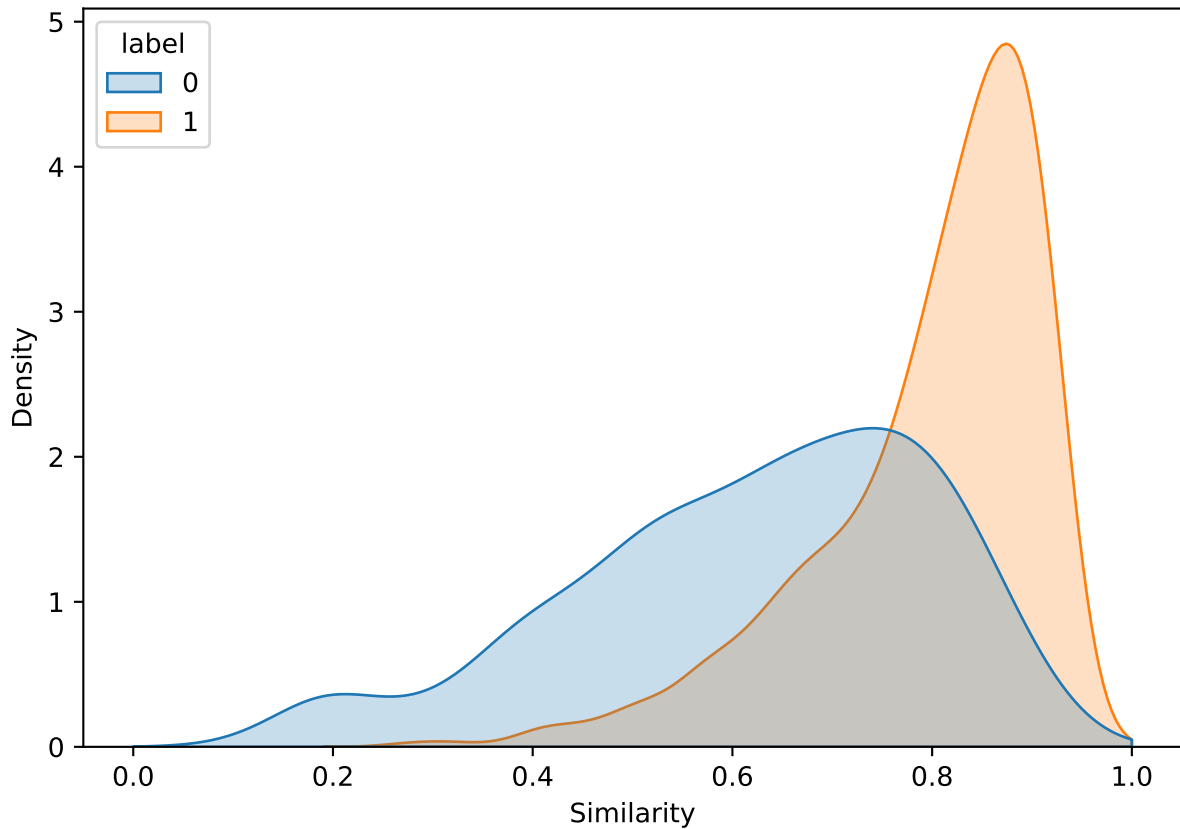

Supplement: supplementary_material [file attachment]
